# Supplementary material
Source: publisher figshare collection journal article supplement (https://acs.figshare.com/ndownloader/files/5501426)
Supplement: Supplementary file 1 [file 5501426]

## **Supporting Information**

### **Natural Tripeptide-Based Inhibitor of Multifaceted Amyloid $\beta$ Toxicity**

K. Rajasekhar, Chilakapati Madhu and T. Govindaraju\*

Bioorganic Chemistry Laboratory, New Chemistry Unit, Jawaharlal Nehru Centre for Advanced  
Scientific Research, Jakkur P.O., Bengaluru 560064, Karnataka, India

Email: tgraju@jncasr.ac.in

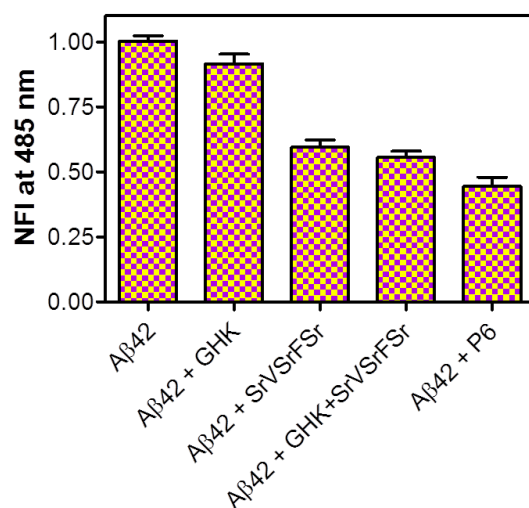

**Figure S1.** Inhibition of Aβ42 aggregates studied by thioflavin (ThT) assay. Aβ42 (10 μM) was incubated alone and independently with peptides GHK, SrVSrFSr, GHK and SrVSrFSr, and **P6** in 1:2 stoichiometry and their influence on aggregation is quantified by measuring ThT fluorescence intensity, which is represented as normalized fluorescence intensity at 485 nm for a given time point (48 h).

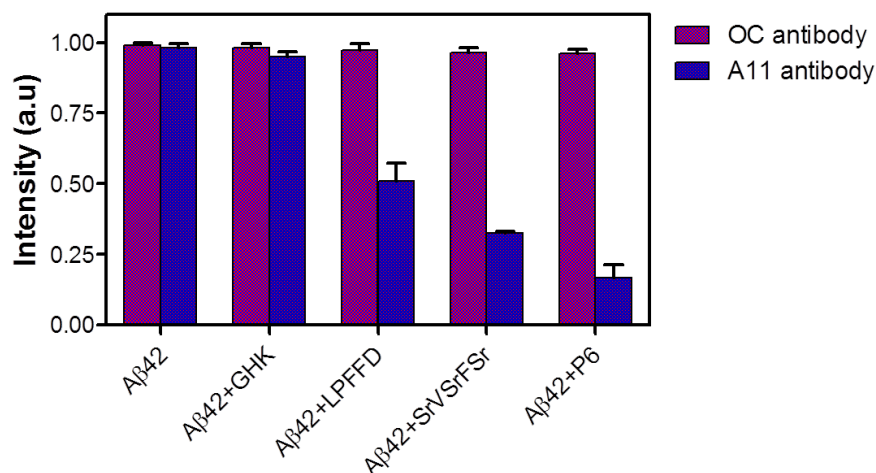

**Figure S2.** Plot of normalized chemiluminescence intensity's obtained from dot blot analysis of Aβ42 (10 μM) aggregates incubated with 50 μM peptides (GHK, LPFFD, SrVSrFSr and **P6**) at 37 °C. OC or A11 (1:3000) is used as primary antibody followed by HRP conjugated anti-mouse antibody (1:10000) as secondary antibody. Each experiment was repeated three times (n = 3). Error bars represent the standard deviation (SD) of the measurement.

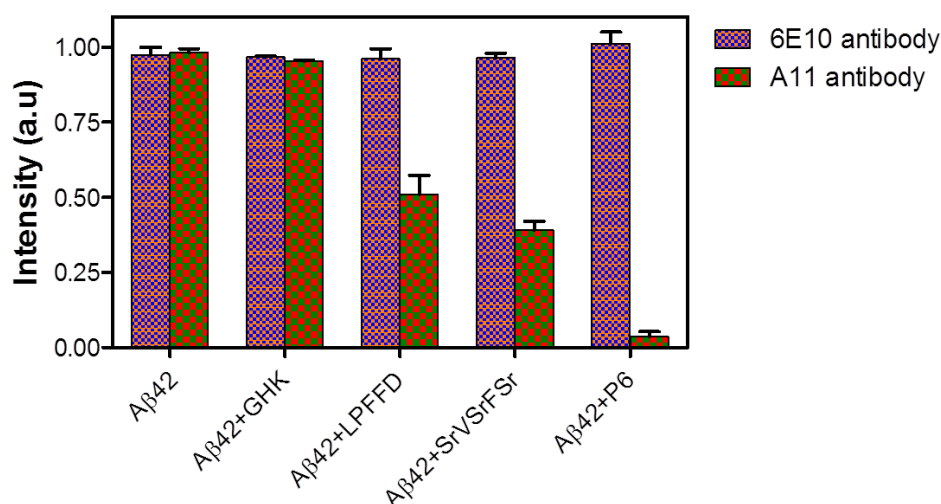

**Figure S3.** Plot of normalized chemiluminescence intensities obtained from dot blot analysis of Aβ42 (10 μM) incubated with 50 μM peptide (GHK or LPFFD or SrVSrFSr or **P6**) at 37 °C. 6E10 or A11 (1:3000) is used as primary antibody followed by HRP conjugated anti-mouse antibody (1:10000) as secondary antibody. Each experiment was repeated three times (n = 3) and error bars represent the standard deviation (SD) of the measurements.

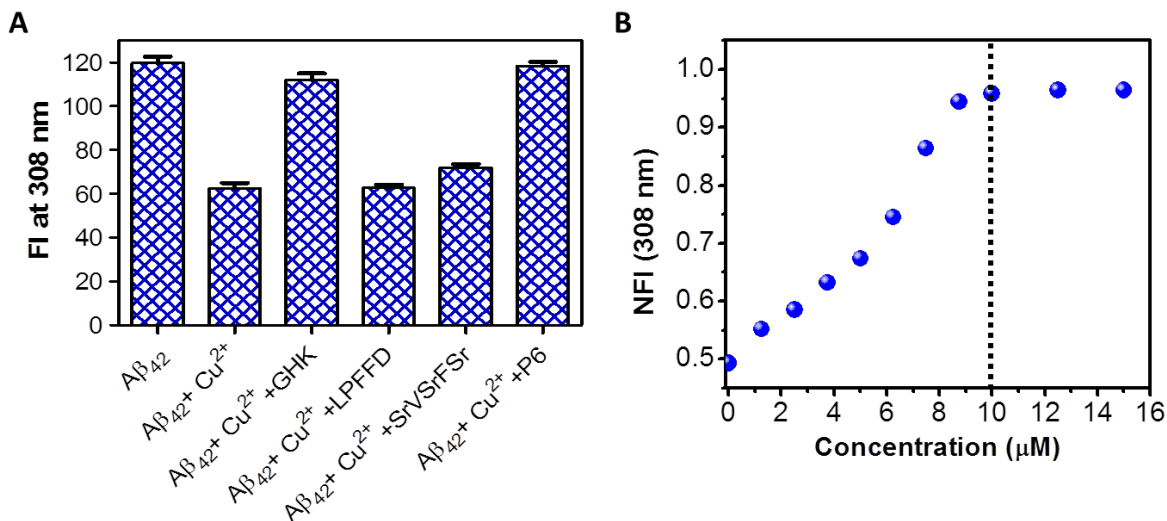

**Figure S4.** Extraction of metal ion from Aβ42-Cu<sup>2+</sup> complex. (A) Tyr fluorescence measured for Aβ42-Cu<sup>2+</sup> (10 μM) in presence of 20 μM peptide (GHK or LPFFD or **P6**). The fluorescence intensity was measured at 308 nm with excitation at 285 nm. (B) Fluorescence enhancement at 308 nm upon addition of **P6** to Aβ42-Cu<sup>2+</sup> complex in a concentration-dependent manner. **P6** and Cu<sup>2+</sup> exhibit 1:1 binding stoichiometry.

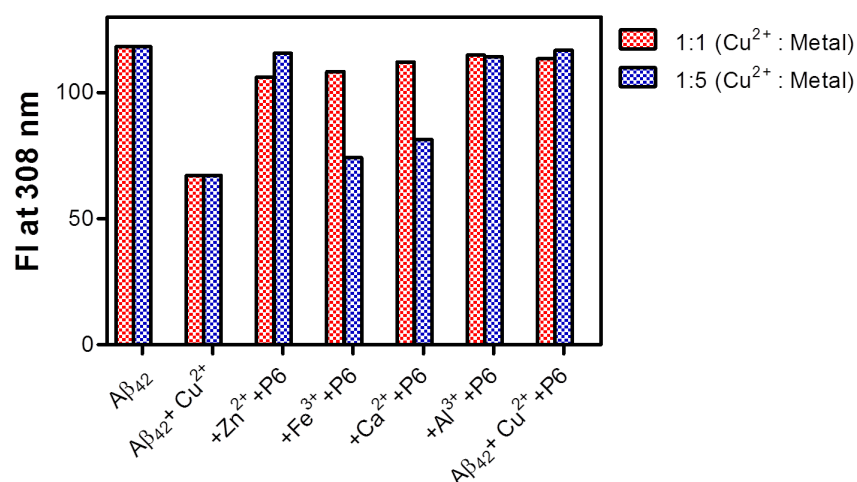

**Figure S5.** Plot of fluorescence enhancement at 308 nm upon treating  $\text{A}\beta_{42}\text{-Cu}^{2+}$  complex with **P6** in presence of different metal ions ( $\text{Zn}^{2+}$ ,  $\text{Fe}^{3+}$ ,  $\text{Ca}^{2+}$  and  $\text{Al}^{3+}$ ).

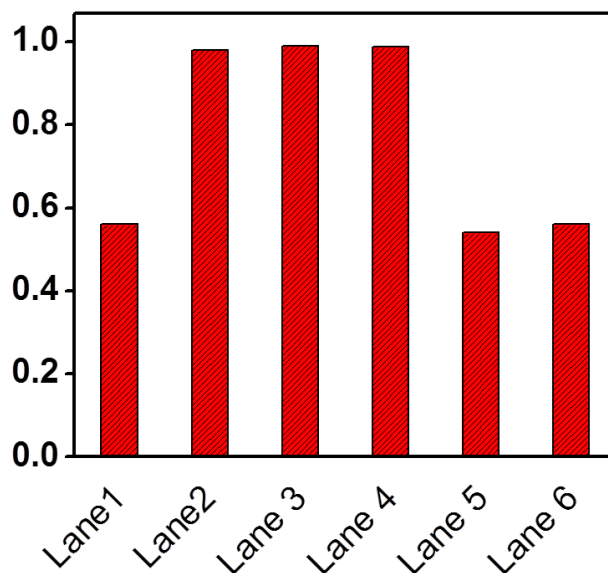

**Figure S6.** Plot for band intensities of c-DNA (pBR322) band in agarose gel (Figure 6). Each lane (1, 2, 3, 4, 5 and 6) has plasmid DNA (pBR322),  $\text{A}\beta_{42}$  (1.1  $\mu\text{M}$ ),  $\text{Cu}^{2+}$  (1  $\mu\text{M}$ ), ascorbate (150  $\mu\text{M}$ ) treated with peptides GHK (lane 5, 2  $\mu\text{M}$ ), LPFFD (lane 3, 2  $\mu\text{M}$ ), SrVSrFSr (lane 4, 2  $\mu\text{M}$ ) and **P6** (lane 6, 2  $\mu\text{M}$ ) incubated at 37 °C and ran on agarose gel.

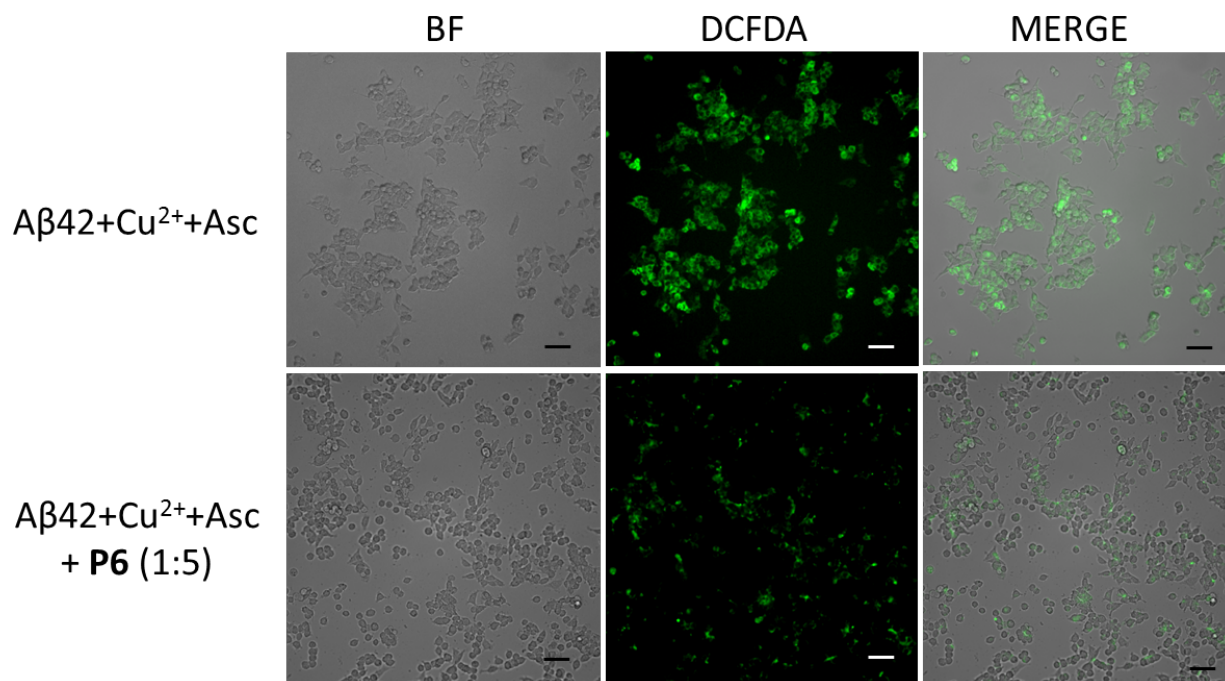

**Figure S7.** Fluorescent microscope images of PC12 cells used in DCFDA assay (scale bar 50 $\mu$ M)

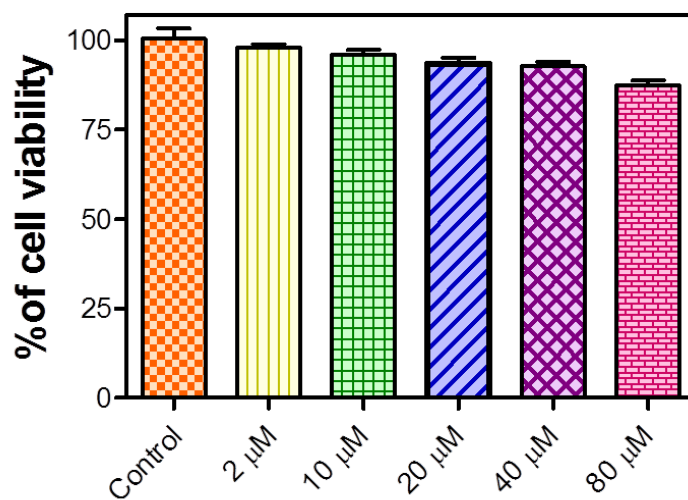

**Figure S8.** MTT assay (cell viability assay) for **P6** with varying concentrations in PC12 cells.

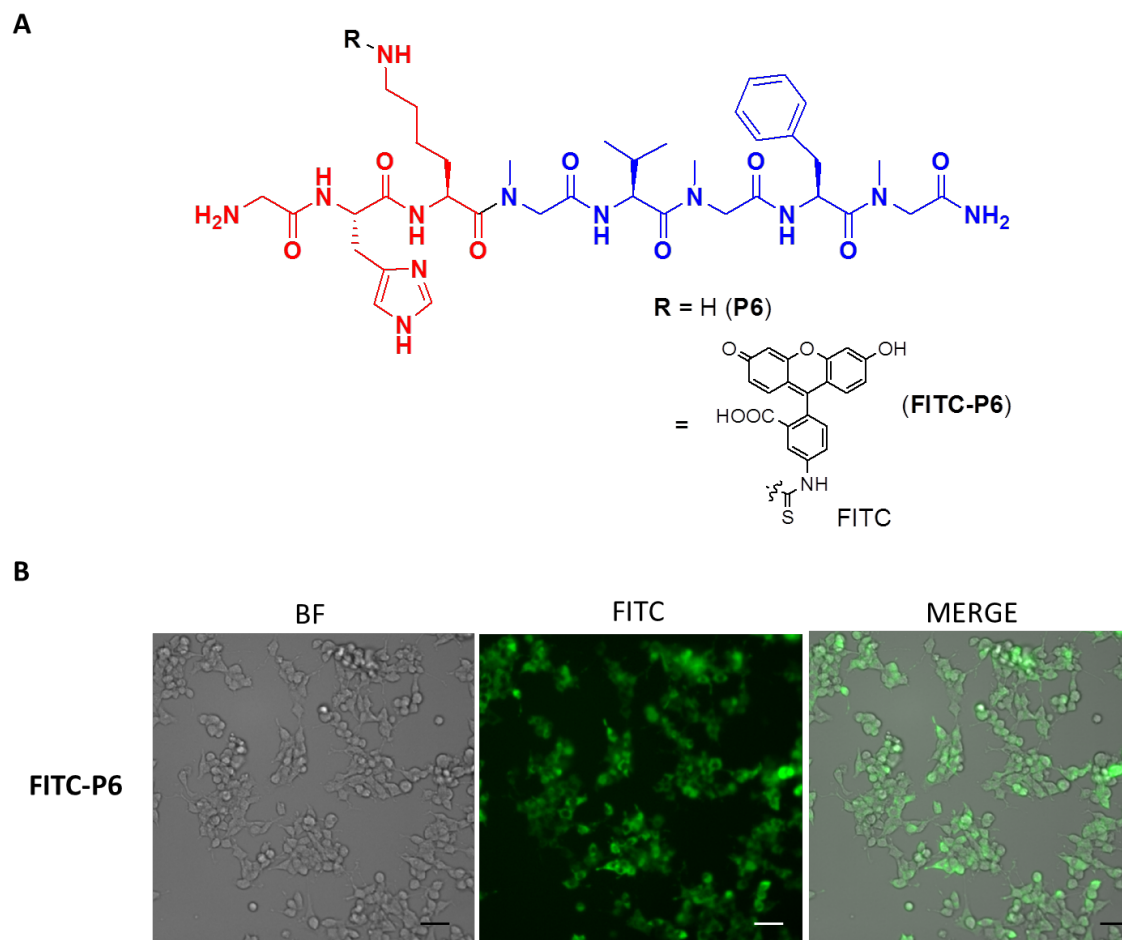

**Figure S9.** Cell permeability of **P6**. (A) Structure of **FITC-P6** (B) Fluorescent microscope images of PC12 cell incubated with FITC-P6 (20  $\mu$ M) for 2h at 37  $^{\circ}$ C. Scale bar 50  $\mu$ M

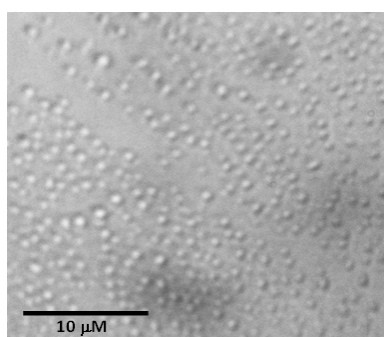

**Figure S10.** Bright field microscopic image of synthetic vesicles in 10 mM PBS buffer, used for liposome leakage assay.

## HRMS and HPLC traces

| Name           | Sequence                                  | Exact<br>(calculated)<br>mass | Observed mass                |
|----------------|-------------------------------------------|-------------------------------|------------------------------|
| GHK            | Gly-His-Lys                               | 340.1848                      | 340.1859 [M+H] <sup>+</sup>  |
| LPFFD          | Lys-Pro-Phe-Phe-Asp                       | 637.3344                      | 637.3348 [M+H] <sup>+</sup>  |
| SrVSrFSr       | <b>Sr-Val-Sr-Phe-Sr</b>                   | 499.2645                      | 499.2648 [M+Na] <sup>+</sup> |
| <b>P6</b>      | Gly-His-Lys- <b>Sr-Val-Sr-Phe-Sr</b>      | 821.4398                      | 821.4391 [M+Na] <sup>+</sup> |
| <b>FITC-P6</b> | <b>FITC- Gly-His-Lys-Sr-Val-Sr-Phe-Sr</b> | 1188.4726                     | 1188.4896 [M+H] <sup>+</sup> |

**Sr** = Sarcosine (N-methylglycine).

| Peptide        | Gradient                                                           | Flow<br>rate<br>(ml/min) | Retention<br>time (R <sub>t</sub> ) |
|----------------|--------------------------------------------------------------------|--------------------------|-------------------------------------|
| GHK            | 0-40% MeCN (0.1% TFA) in H <sub>2</sub> O (0.1% TFA) over 15 min   | 8                        | 7.48 min                            |
| LPFFD          | 0-100% MeCN (0.1% TFA) in H <sub>2</sub> O (0.1% TFA) over 15 min  | 8                        | 9.72 min                            |
| SrVSrFSr       | 20-100% MeCN (0.1% TFA) in H <sub>2</sub> O (0.1% TFA) over 15 min | 8                        | 9.61 min                            |
| <b>P6</b>      | 0-100% MeCN (0.1% TFA) in H <sub>2</sub> O (0.1% TFA) over 15 min  | 8                        | 8.93 min                            |
| <b>FITC-P6</b> | 20-100% MeCN (0.1% TFA) in H <sub>2</sub> O (0.1% TFA) over 20 min | 8                        | 12.5 min                            |

## GHK

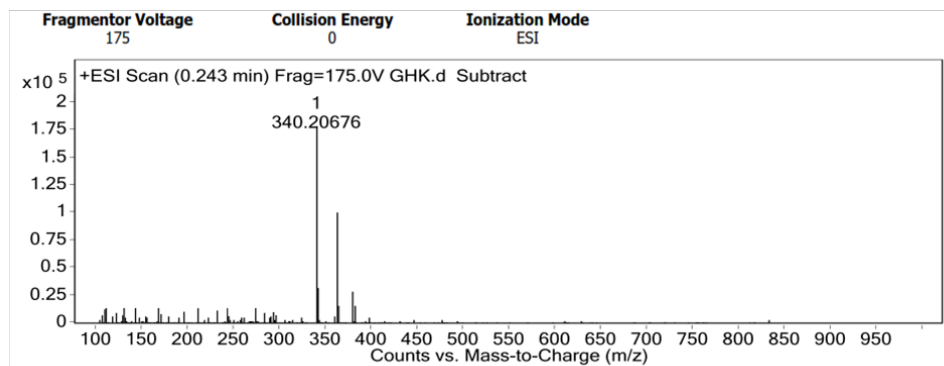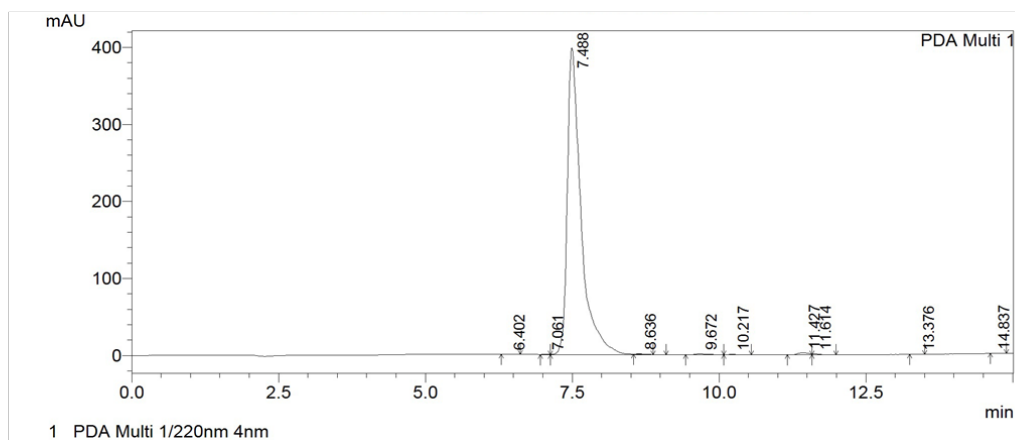

## LPFFD

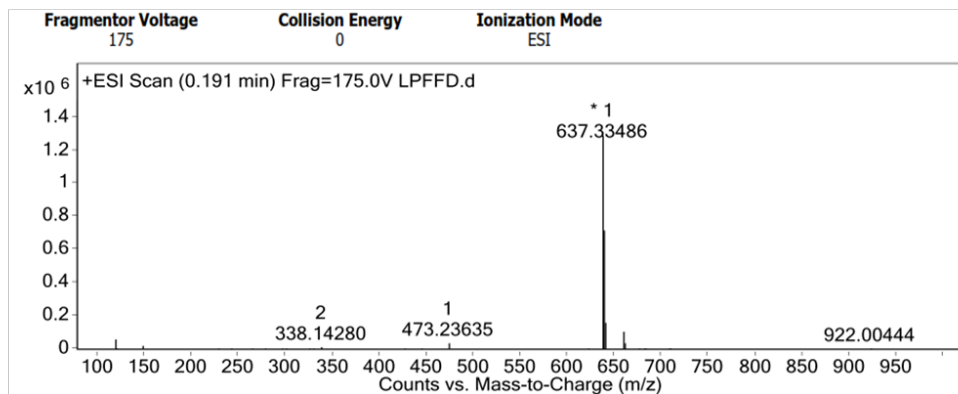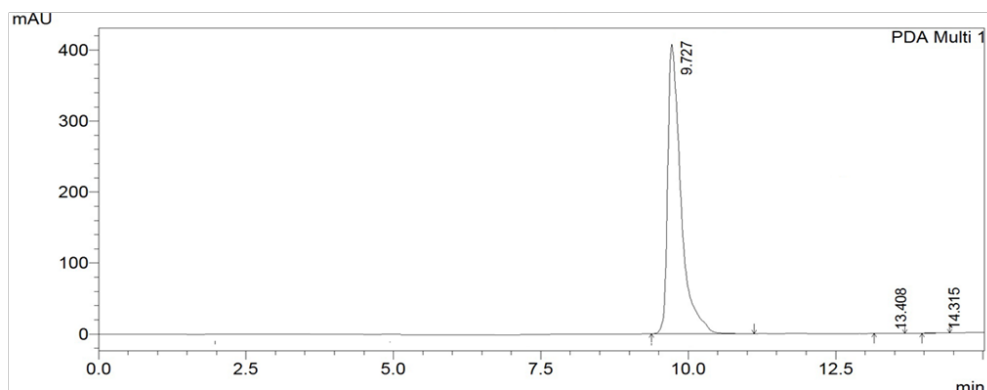



P6

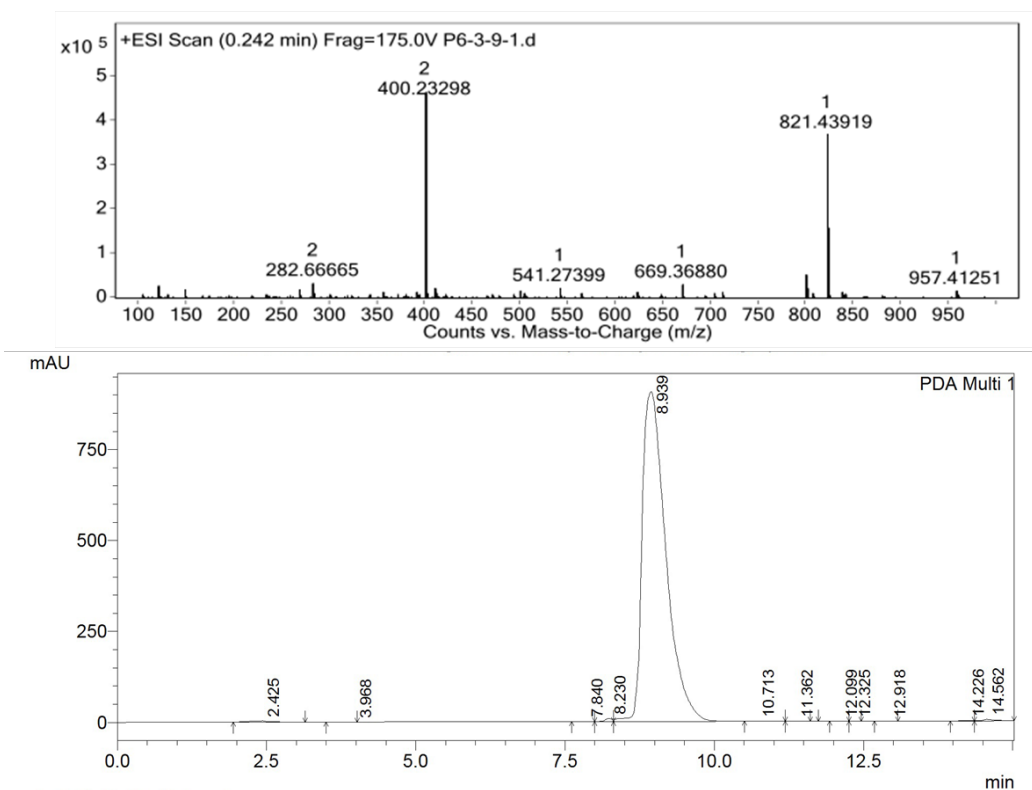

SrVSrFSr

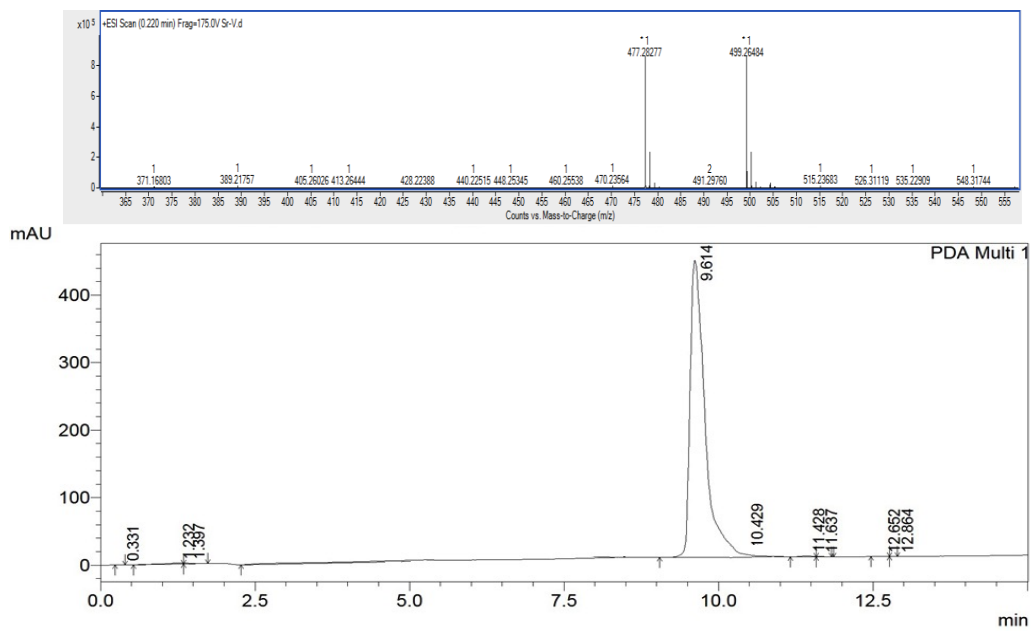

## FITC-P6

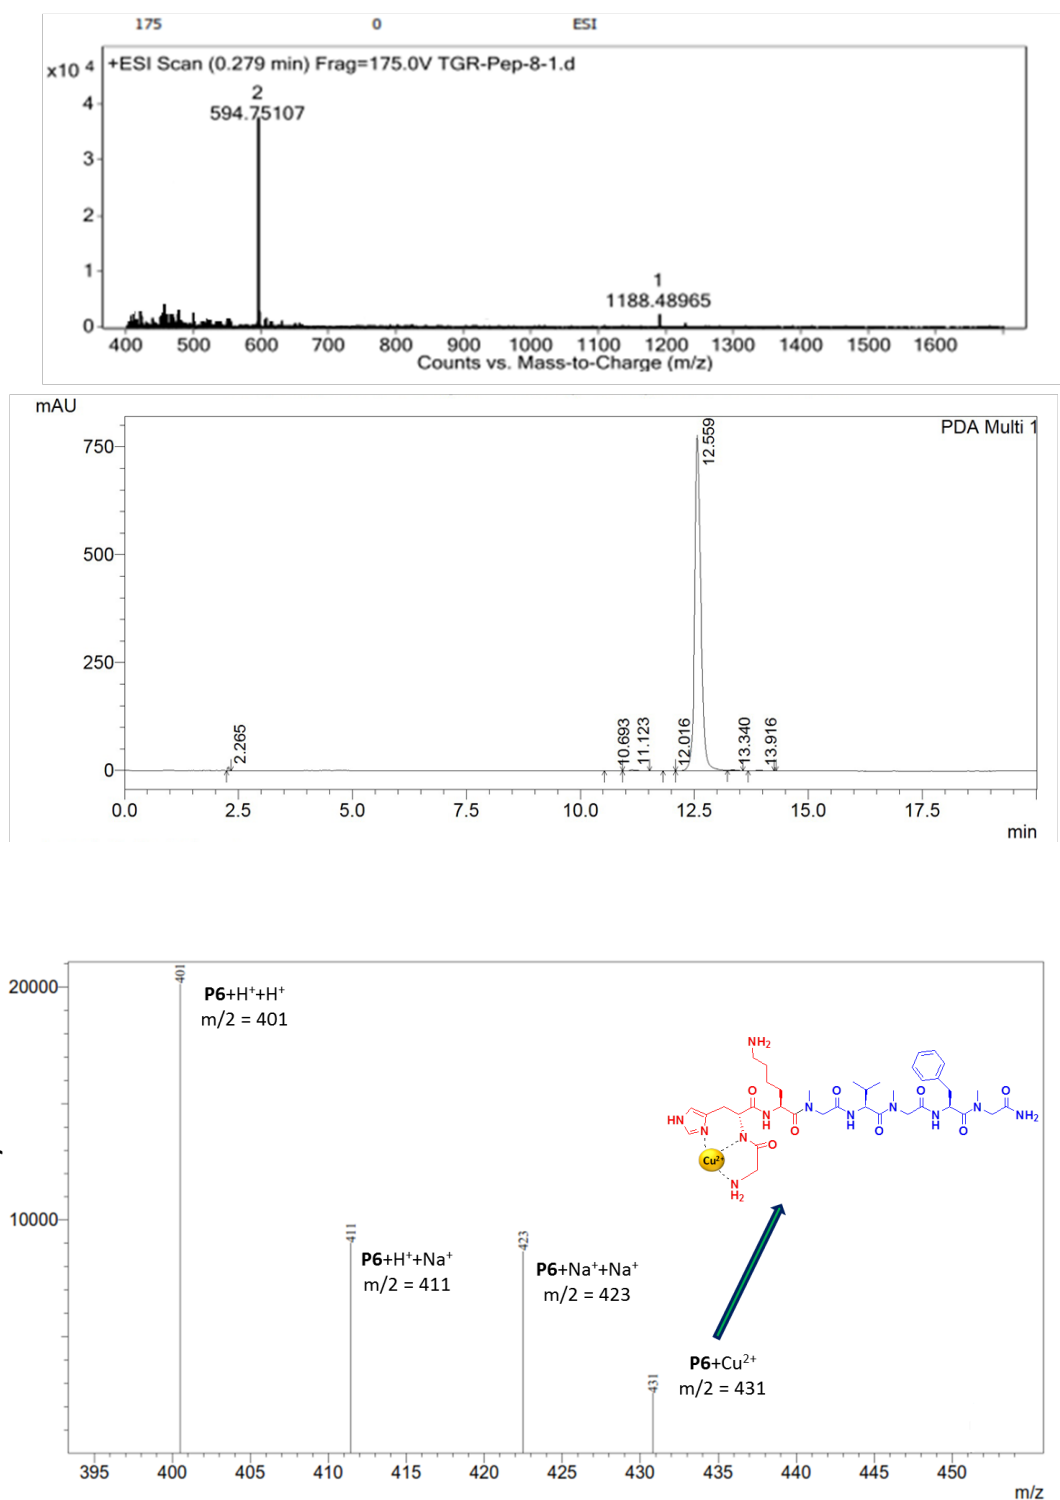

LCMS mass spectrum of complex **P6**+Cu<sup>2+</sup> in PBS buffer (1 mM)
